# Supplementary material
Source: ML conference proceedings conference paper supplement (https://proceedings.neurips.cc/paper_files/paper/2017/hash/9c8661befae6dbcd08304dbf4dcaf0db-Abstract.html)
Supplement: Supplementary file 1 [file 9c8661befae6dbcd08304dbf4dcaf0db-Supplemental.zip]

Archive with 1 entries (1 files):
- blackbox_backpropagation_appendix.pdf 
